# Supplementary material
Source: MDPI journal article supplement (https://www.mdpi.com/1873-149X/28/4/35)
Supplement: s1 [file s1]

**Table S1. Small fiber neuropathy screening list questionnaire (19).**

|                                                                                                                   |                                                   |
|-------------------------------------------------------------------------------------------------------------------|---------------------------------------------------|
| <b>Part 1:</b>                                                                                                    |                                                   |
| <b>These questions are aimed at finding out how often you experience the following complaints.</b>                |                                                   |
| 1. I have painful arms <sup>5</sup>                                                                               | never/sometimes/variably/often/always             |
| 2. I suffer from palpitations <sup>1</sup>                                                                        | never/sometimes/variably/often/always             |
| 3. I have problems with my bowel movements <sup>2</sup>                                                           | never/sometimes/variably/often/always             |
| 4. I have difficulties with urinating (either in emptying my bladder or being able to hold my water) <sup>3</sup> | never/sometimes/variably/often/always             |
| 5. My food does not seem to go down well <sup>2</sup>                                                             | never/sometimes/variably/often/always             |
| 6. I suffer from muscle cramps <sup>4</sup>                                                                       | never/sometimes/variably/often/always             |
| 7. My feet and/or hands are colder than I am used to <sup>5</sup>                                                 | never/sometimes/variably/often/always             |
| 8. I have chest pain <sup>4</sup>                                                                                 | never/sometimes/variably/often/always             |
| <b>Part 2:</b>                                                                                                    |                                                   |
| <b>These questions are aimed at finding out how serious your complaints are.</b>                                  |                                                   |
| 9. I have the feeling that my food gets stuck in my throat <sup>2</sup>                                           | not at all/slightly/variably/moderately/seriously |
| 10. At night I throw the bedclothes off my legs <sup>5</sup>                                                      | not at all/slightly/variably/moderately/seriously |
| 11. I have difficulties with urinating (either emptying my bladder or being able to hold my water) <sup>3</sup>   | not at all/slightly/variably/moderately/seriously |
| 12. I have dry eyes <sup>6</sup>                                                                                  | not at all/slightly/variably/moderately/seriously |
| 13. I have blurred vision <sup>6</sup>                                                                            | not at all/slightly/variably/moderately/seriously |
| 14. I feel dizzy when I get up <sup>1</sup>                                                                       | not at all/slightly/variably/moderately/seriously |
| 15. I have sudden hot flushes <sup>5</sup>                                                                        | not at all/slightly/variably/moderately/seriously |
| 16. My feet and/or hands are colder than I am used to <sup>5</sup>                                                | not at all/slightly/variably/moderately/seriously |
| 17. I have painful arms <sup>5</sup>                                                                              | not at all/slightly/variably/moderately/seriously |
| 18. The skin of my legs is over-sensitive <sup>5</sup>                                                            | not at all/slightly/variably/moderately/seriously |
| 19. I have a tingling sensation in my hands (pins and needles) <sup>5</sup>                                       | not at all/slightly/variably/moderately/seriously |

|                                                                            |                                                   |
|----------------------------------------------------------------------------|---------------------------------------------------|
| 20. I have a tingling sensation in my legs (pins and needles) <sup>5</sup> | not at all/slightly/variably/moderately/seriously |
| 21. I have chest pain <sup>4</sup>                                         | not at all/slightly/variably/moderately/seriously |

<sup>1</sup> In this study is grouped as “cardiovascular disorders”

<sup>2</sup> In this study is grouped as “gastrointestinal disorders”

<sup>3</sup> In this study is grouped as “urinary disorders”

<sup>4</sup> In this study is grouped as “musculoskeletal disorders”

<sup>5</sup> In this study is grouped as “skin and mucous membranes disorders”

<sup>6</sup> In this study is grouped as “ophtalmologic disorders’
